# Supplementary material for: Soluble Immune Checkpoints, Gut Metabolites and Performance Status as Parameters of Response to Nivolumab Treatment in NSCLC Patients
Source: MDPI journal article supplement (doi:10.3390/jpm10040208), 2020-11-04
Supplement: s1 [file s1]

**Table S1:** Immune molecules analyzed in the serum of NSCLC patients at T0 and >T0 with no significant difference

|                   | <b>T0</b> | <b>&gt;T0</b> | <b>p value</b> |
|-------------------|-----------|---------------|----------------|
|                   | pg/mL     | pg/mL         |                |
| <b>IL1a</b>       | 383       | 489           | 0.3            |
| <b>IL1b*</b>      |           |               | NA             |
| <b>IL4</b>        | 1598      | 2216          | 0.2            |
| <b>IL6*</b>       |           |               | NA             |
| <b>IL8</b>        | 816       | 929           | 0.6            |
| <b>IL10</b>       | 416       | 423           | 0.8            |
| <b>IL12</b>       | 891       | 1004          | 0.5            |
| <b>IL13*</b>      |           |               | NA             |
| <b>IL17*</b>      |           |               | NA             |
| <b>IFNg</b>       | 1151      | 1357          | 0.2            |
| <b>IFNa</b>       | 86        | 109           | 0.3            |
| <b>TNFa</b>       | 3133      | 3337          | 0.3            |
| <b>GITR</b>       | 45        | 59            | 0.6            |
| <b>CCL2</b>       | 3835      | 4036          | 0.5            |
| <b>CCL3</b>       | 847       | 983           | 0.3            |
| <b>CCL4</b>       | 3649      | 4188          | 0.2            |
| <b>GMCSF*</b>     |           |               | NA             |
| <b>ICAM1</b>      | 396094    | 466877        | 0.4            |
| <b>IP10</b>       | 1635      | 1881          | 0.3            |
| <b>P-selectin</b> | 1100905   | 1154777       | 0.4            |
| <b>E-selectin</b> | 312378    | 346875        | 0.1            |
| <b>CD27*</b>      |           |               | NA             |
| <b>CD28</b>       | 1549      | 1133          | 0.2            |
| <b>CD80</b>       | 272       | 249           | 0.4            |
| <b>CD137</b>      | 632       | 644           | 0.9            |
| <b>BTLA4</b>      | 2332      | 2400          | 0.9            |
| <b>CTLA4</b>      | 72        | 73            | 0.9            |
| <b>IDO*</b>       |           |               | NA             |
| <b>HVEM</b>       | 367       | 509           | 0.2            |
| <b>PDL1</b>       | 32        | 33            | 0.9            |
| <b>Tim3</b>       | 7815      | 8093          | 0.7            |

NA: not applicable

\*concentration value not measurable
