# Supplementary material for: Soluble Immune Checkpoints, Gut Metabolites and Performance Status as Parameters of Response to Nivolumab Treatment in NSCLC Patients
Source: MDPI journal article supplement (doi:10.3390/jpm10040208), 2020-11-04
Supplement: s1 [file s1]

Table S4: volatile and non-volatile dysbiosis- and eubiosis-associated metabolites evaluated in R and NR NSCLC patients

| <b>Volatile metabolites</b>          |                  |                 |
|--------------------------------------|------------------|-----------------|
| COMPOUNDS (mg/kg)                    | Average value NR | Average value R |
| 1-Butanamine, N-methyl-              | 1,259            | 0,000           |
| 2-Butanol, 3-methyl-                 | 1,576            | 0,000           |
| 2-Ethyl-1-hexanol                    | 19,866           | 0,000           |
| 2-Methyl-3-pentanol                  | 20,690           | 0,000           |
| n-Hexylmethylaniline                 | 9,183            | 0,000           |
| 1-Hexanol                            | 18,891           | 8,973           |
| 2-Hexanol                            | 72,105           | 9,133           |
| 2-Propanamine                        | 12,672           | 1,141           |
| Benzaldehyde                         | 316,528          | 66,537          |
| Benzeneacetaldehyde                  | 37,536           | 11,120          |
| Ethanol                              | 93,410           | 1,959           |
| Furfural                             | 32,416           | 3,217           |
| Methoxyacetic acid, 3-tridecyl ester | 17,571           | 0,242           |
| p-Cresol                             | 2001,941         | 535,740         |
| Phenol                               | 111,067          | 49,843          |
| 1-Propanamine, N,2-dimethyl-         | 0,000            | 0,815           |
| 2-Octanol                            | 0,000            | 0,701           |
| 3-Methyl-3-buten-1-ol                | 0,000            | 0,656           |
| Butanal, 3-methyl-                   | 0,000            | 32,247          |
| heptanal                             | 0,000            | 0,457           |
| Butyric acid                         | 0,000            | 34,523          |
| Caryophyllene                        | 0,000            | 6,495           |
| g-Terpinene                          | 0,000            | 0,272           |
| p-Cymene                             | 0,000            | 28,302          |
| Pentanoic acid                       | 0,000            | 25,840          |
| 3-Carene                             | 0,505            | 12,293          |
| Anethole                             | 8,370            | 0,000           |
| Eicosane                             | 0,792            | 0,000           |
| <b>Non-volatile metabolites</b>      |                  |                 |
| COMPOUNDS (μmol/g)                   | Average value NR | Average value R |
| Valerate                             | 0,817122999      | 1,638736196     |
| Butyrate                             | 2,780920969      | 7,060359011     |
| Propionate                           | 2,581718723      | 9,205996028     |
| Dysbiosis-associated metabolites     |                  |                 |
| Eubiosis-associated metabolites      |                  |                 |
