# Supplementary material for: Soluble Immune Checkpoints, Gut Metabolites and Performance Status as Parameters of Response to Nivolumab Treatment in NSCLC Patients
Source: MDPI journal article supplement (doi:10.3390/jpm10040208), 2020-11-04
Supplement: s1 [file s1]

Table S2: Gut microbiota analysis

| Order              | Family              | OTUs*                        | NR_average value | R_average value |
|--------------------|---------------------|------------------------------|------------------|-----------------|
| Bacteroidales      | Bacteroidaceae      | Bacteroides                  | 0,04567          | 0,09390         |
| Clostridiales      | Lachnospiraceae     | Lachnospiraceae              | 0,02488          | 0,03161         |
| Clostridiales      | Ruminococcaceae     | Ruminococcus                 | 0,01234          | 0,01627         |
| Bacteroidales      | Bacteroidaceae      | Bacteroides_plebeius         | 0,00156          | 0,01578         |
| Bacteroidales      | Prevotellaceae      | Prevotella_copri             | 0,00000          | 0,01528         |
| Bacteroidales      | Prevotellaceae      | Prevotella                   | 0,00218          | 0,03149         |
| Coriobacteriales   | Coriobacteriaceae   | Coriobacteriaceae            | 0,00369          | 0,01134         |
| Bacteroidales      | Rikenellaceae       | Rikenellaceae                | 0,00278          | 0,03813         |
| Clostridiales      | Lachnospiraceae     | Coproccoccus                 | 0,00366          | 0,05241         |
| Clostridiales      | Lachnospiraceae     | Ruminococcus_gnavus          | 0,00281          | 0,01239         |
| Clostridiales      | Ruminococcaceae     | Ruminococcus_bromii          | 0,03820          | 0,03304         |
| Lactobacillales    | Lactobacillaceae    | Lactobacillus                | 0,01564          | 0,01506         |
| Lactobacillales    | Streptococcaceae    | Streptococcus                | 0,14144          | 0,03838         |
| Clostridiales      | Ruminococcaceae     | Ruminococcaceae              | 0,15676          | 0,13845         |
| Clostridiales      | Ruminococcaceae     | Faecalibacterium_prausnitzii | 0,02094          | 0,01563         |
| Clostridiales      | Ruminococcaceae     | Oscillospira                 | 0,01575          | 0,01035         |
| Enterobacteriales  | Enterobacteriaceae  | Enterobacteriaceae           | 0,08424          | 0,07599         |
| Verrucomicrobiales | Verrucomicrobiaceae | Akkermansia_muciniphila      | 0,14429          | 0,09120         |
| Methanobacteriales | Methanobacteriaceae | Methanobrevibacter           | 0,03610          | 0,00588         |
| Bifidobacteriales  | Bifidobacteriaceae  | Bifidobacterium_longum       | 0,01266          | 0,00601         |
| Bacteroidales      | Bacteroidaceae      | Bacteroides_fragilis         | 0,01126          | 0,00700         |
| Enterobacteriales  | Enterobacteriaceae  | Citrobacter                  | 0,01081          | 0,00018         |
| Clostridiales      | Lachnospiraceae     | Dorea                        | 0,01149          | 0,00323         |

\* OTUs= operational taxonomic unit
